# Supplementary material
Source: PubMed Central journal article supplement (PMC6218603)
Supplement: mmc1.pdf [file mmc1.pdf]

## Supplemental Data

### **Bi-allelic *CCDC47* Variants Cause a Disorder Characterized by Woolly Hair, Liver Dysfunction, Dysmorphic Features, and Global Developmental Delay**

Marie Morimoto, Helen Waller-Evans, Zineb Ammous, Xiaofei Song, Kevin A. Strauss, Davut Pehlivan, Claudia Gonzaga-Jauregui, Erik G. Puffenberger, Charles R. Holst, Ender Karaca, Karlla W. Brigatti, Emily Maguire, Zeynep H. Coban-Akdemir, Akiko Amagata, C. Christopher Lau, Xenia Chepa-Lotrea, Ellen Macnamara, Tulay Tos, Sedat Isikay, Michele Nehrebecky, John D. Overton, Matthew Klein, Thomas C. Markello, Jennifer E. Posey, David R. Adams, Emyr Lloyd-Evans, James R. Lupski, William A. Gahl, and May Christine V. Malicdan

## **SUPPLEMENTAL DATA**

### **SUPPLEMENTAL NOTE: CASE REPORTS**

#### **Proband 1**

The proband presented to the NIH Undiagnosed Diseases Program as a 5-year-old female of non-consanguineous, mixed Northern European and Native American descent with a complex medical history. She was born to a 30-year-old primigravida mother who carries a mosaic 46,XX, 47,XXX karyotype. Father and child both carried normal karyotypes. Pregnancy was complicated by polyhydramnios and slow fetal heart rates. Premature rupture of membranes at 30 weeks of gestation required preterm delivery by Caesarean section, but steroids and antibiotics were administered in a timely manner prior to delivery. The proband was a 1600-gram (75th %ile) infant with APGAR scores eight and nine, at one- and five-minutes respectively. On infant exam, she exhibited microcephaly, hypotonia, bilateral club foot deformities, and a patent ductus arteriosus. Her right foot was reduced at birth but the left required casting. Complete blood counts identified anemia during infancy, which resolved by 5 years of age. She was unable to breast or bottle feed and admitted to the NICU, where she was diagnosed with oral motor dyspraxia and severe gastroesophageal reflux (GERD). Due to microcephaly and developmental concerns neuroimaging was ordered. At 6 weeks of age, oral feedings remained recreational and nasogastric supplementation proved insufficient to support weight gain. She required Nissen fundoplication with gastrostomy tube (G-tube) placement. She did well with high fiber supplement PediaSure Formula and grew along the 5th percentiles until 8 months of age, after which growth accelerated.

Survey imaging around 2 years old revealed mild, generalized osteopenia. Luckenschadel (“copper beaten”) calvaria suggested increased intracranial pressures. Lumbar vertebrae were

notably elongated in the craniocaudal dimension, however with uniform marrow and disk spaces. The tip of the conus projected to the upper L1 level. A fibrolipoma of the filum terminale tethered to the posterior aspect of the thecal sac at L4. There was slight increase in the lipomatous tissue within the epidural space in the upper sacral regions but no intrathecal lipoma or nerve root displacement. She underwent partial L1-partial L2 laminectomy and sectioning of fatty phylum terminale to preempt the possible loss of bladder-bowel-lower extremity function with age. She demonstrated incomplete ossification at the pubic rami, bilateral cox valga, with mild tibial bowing. She continues to experience chronic bilateral hip subluxation and dislocation with spontaneous reductions.

The proband began to demonstrate episodes of nighttime oxygen desaturations from a daytime baseline of 93% to as low as 68%. Procedural sedations with fentanyl and propofol demonstrated similar oxygen desaturations. Sleep studies did not identify obstructive or central apneic pauses, but she was referred for tonsillectomy and adenoidectomy at 11 months of age for obstructive sleep apnea. Sleep studies also identified advanced circadian phase and fragmented sleep patterns. Specifically, electroencephalography background consisted of delta and theta rhythms, distributed symmetrically over the hemispheres. Chewing and rocking artifacts were noted. Occasional dominant 3-4 Hz rhythms are seen but without focalities or epileptiform charges.

She began to have irregular stooling patterns at 2 years of age. She had decreased lower gastrointestinal motility and took standard lactose free formulas on an unvarying diet. Feeding and swallow evaluation identified feeding resistance secondary to oral hypersensitivity and sensory defensiveness. She experienced a significant gastrointestinal bleed following G- tube replacement. The tissue around the stoma was notably friable and bled easily. Recurrent emesis

prompted an endoscopic evaluation. Her esophagus and duodenum were normal. Her stomach demonstrated focal erythema in several areas along the greater curvature with a small ulceration below the G-tube, but no active bleed was identified. Lower endoscopy was negative. Evaluation for inflammatory bowel disease was negative. The bleed was later attributed to a cholelith tearing of the bile ducts.

Starting around 3 years of age, the proband experienced an episode of pancreatitis with liver inflammation. She had recurrent steatorrhea and low fecal elastase levels, but no history of hyperbilirubinemia or acholic stools. The process was considered to be due to biliary microlithiasis. The common bile duct was normal on ultrasound and endoscopic retrograde cholangiopancreatography, but multiple smooth surface, multifaceted grey-black cholesterol stones were identified. Severe pruritus persisted despite treatment with bile salts leaving the proband uncomfortable most hours of the day. Cholecystectomy failed to resolve the problem and she progressed to recurrent hospitalizations for similar episodes of pancreatitis. She failed all treatments to control symptoms of her severe pruritus and urticaria. Evaluation for primary biliary cholangitis and autoimmune hepatitis were negative. Neither endoscopic retrograde cholangiopancreatography nor subsequent magnetic resonance cholangiopancreatography identified pancreas divisum. Pancreatic ducts were of normal caliber and signal. Liver biopsies revealed portal-based septal fibrosis, stage two to three, mild sinusoidal dilation, and increased copper deposition, without stainable iron. The liver changes were considered related to pancreatic irritability, given the 2+ distribution of copper within the centrilobular hepatocytes. Biliary obstruction and Wilson's disease characteristically presents with portal-based and zonal-based distributions, respectively. The copper present in the liver biopsy is furthermore suggestive of an independent metabolic process. She was otherwise diagnosed with exocrine pancreatic

insufficiency. On imaging, there was no significant scarring or calcification of the pancreas. She showed only large dilated, gas filled bowel loops. She had never had a period of significant cholestasis, although she had elevations in direct bilirubin.

She had no hearing difficulties, but a history of recurrent otitis media with tympanic perforations. She required bilateral tympanostomy tubes by 3 years of age. The inner ear structures are grossly unremarkable, however there was suspected superior semicircular canal dehiscence. She experienced a parainfluenza type 2 pneumonia at 4 years old. All immunizations were up to date. Family history was significant for three spontaneous abortions subsequent to the birth of the proband and developmental delays with learning difficulties in one paternal cousin. Karyotyping and signature microarray returned inconclusive. She was managed on daily regimens of polyethylene glycol, oral pancrelipase supplements, ursodiol, loratadine, famotidine, and triamcinolone acetonide cream. She was given albuterol, nystatin, ofloxacin otic drops, and ibuprofen as needed. With bladder distention, there was notably posterior-inferior extrinsic indentation evident. She had no bladder problems.

At 5 years old, height remained at the 50th percentile, and weight between the 15th and 20th percentiles. She exhibited microcephaly, brachycephaly, and positional plagiocephaly. Her hair was sparse, curly, and woolen. She had low-set ears, symmetrical but coarse facies with midface hypoplasia, hypertelorism, long eyelashes, a downturned mouth, and a small nose. She had roving eye movements with ptosis, but extraocular movements were intact, without nystagmus. On dilated ophthalmologic examination, she had a normal macula, disc, and vessels. Both optic nerves were pink. She had astigmatism, hyperopia, and cortical visual impairment. Formal speech and language pathology evaluation around two years old identified a receptive and expressive language delay of over 50% for age. She remains significantly developmentally

delayed. She looked around, especially at bright lights, but did not make eye contact or look at specific objects for extended periods of time. Hearing was intact. She seemed to be able to hear and localized sounds well. Proband remained unable to follow commands. She made noises, but no specific words. She remained constantly moving, writhing, and moaning.

She demonstrated thick lips, a small chin, an underbite with dental crowding. Her palate elevated, and her tongue lay at the midline, without fasciculations. She had a normal pharynx. She demonstrated a loss of lumbar lordosis, but no other spinal abnormality. She demonstrated both truncal and appendicular hypotonia with poor head control. She had frog leg posturing when lying down. She moved both arms and legs equally well. She did not however hold objects, bear weight, or sit up without support. She could roll over and used a wheelchair and a series of standers allowing various postures. She expressed satisfaction with massage of her arms and legs. Deep tendon reflexes were suppressed throughout and especially in the lower extremities. She has arthrogryptic third digits, and bilateral but asymmetrical hypoplasia of the fifth digits. Her left fifth digit is missing the majority of the distal phalanx and the entirety of the nail. Extremities are otherwise without clubbing, cyanosis, or edema. She demonstrated dry skin, mild hypertrichosis of the trunk, and multiple healing abrasions to upper extremities. She was without jaundice or petechiae. Genital exam was significant for clitoral hyperplasia and a small sacral dimple. On auscultation, there was clear S1, S2, regular rate and rhythm with a III out of VI systolic ejection murmur at the left sternal border, but no other rubs or gallops. Her chest was narrow, but the point of maximal impulse was not displaced. Her lungs were clear to auscultation without rales, rhonchi, wheeze, or accessory muscle recruitment. Gastrostomy stoma and cholecystectomy laparoscopy sites were well healed. Her abdomen was non-tender and non-distended with positive bowel sounds. She had hepatosplenomegaly.

CT scans of the temporal lobes identified clear fluid in right middle ear and mastoid air cells as well as a completely opacified left middle ear and left mastoid air cells with bony thinning along the posterior aspect of the mastoid bone. Subsequent brain MRI confirmed several abnormalities of the skull. She had an osteopenic, Luckenschadel skull with brachycephaly with flattening along the right occipital and posterior parietal regions, left to right asymmetry, and low-set ears with the left lower than the right. The brain conformed to the shape of the skull, but the splenium of the corpus callosum had a minor posterior thinning; this was not associated with colpocephaly. The cortical sulci were mildly enlarged, suggesting hypoplasia in the absence of neuromigration anomalies or other congenital malformations in the brain. There was decreased hypointense myelination on the frontal region and anterior limb of the internal capsules relative to age-matched controls. The corpus callosum was myelinated but has an atypical inverted U-shape contour. The pituitary and suprasellar regions were normal. Cranial nerves seven and eight were intact, and inner ear structures and cranial nerves five and six were intact. There was no neuromigration or focal thickening of the cerebellar cortex. There was relative hypoplasia of the nasal bones. Visible intracerebral vasculature and dural sinuses were normal. There was a low position of the torcula without cerebellar exotropia. There was mild prominence of the extra-axial CSF spaces, including the Sylvian fissure, and mild prominence of the third ventricle. No abnormalities of neural migration were identified. The degree of myelination appeared to be appropriate for the proband's age and had significantly progressed when compared to the exam at 17 months of age. However, the terminal zones remained incomplete and amyelinated. MRS identified reduced N-acetyl aspartate levels.

### **Proband 3**

Proband 3 was an Old Order Amish female first seen at The Community Health Clinic (Topeka, IN) at the age of 8 years. She had been followed at Children's Mercy Hospital (Kansas City, MO) for several years with no confirmed diagnosis. She was born to a 33-year-old G10P7A2 mother. There were no major complications during the pregnancy. The mother reported that she measured small and that the movements were slow and less frequent compared to her previous pregnancies. The proband was born at 38 weeks of gestation via normal spontaneous vaginal delivery (NSVD) at home with the presence of a midwife. At birth, the umbilical cord was small and "shriveled", but was three-vessel. The proband was a 2070-gram (<3rd %ile) infant, consistent with small for gestational age (SGA). She was very pale at birth, did not cry for 10-15 minutes, and required extensive suctioning. She was transported to Wright Memorial Hospital (Trenton, MO) where she was placed on oxygen for 12-24 hours. Newborn screening was normal. She was also noted to have a flat right occiput and bilateral clubfoot and hip dysplasia at birth.

Developmentally, her mother reported that the baby was not as responsive as normal at 3 weeks. At 3 months of age, she was diagnosed with failure to thrive (FTT) at which time she had a G-tube placed and she was placed on PediaSure. At 8 years of age, she was able to roll onto her side, but not stomach to back or vice versa. She was unable to grasp objects. The proband was non-verbal, but she made some sounds where her parents could tell if she was happy or upset. She was incontinent of urine and stool. The proband had started to attend a public school that has a program for children with special needs three full days per week.

Her physical examination revealed she was small for her age at 8 years old and she had several dysmorphic features. Facial dysmorphic features included microcephaly with plagiocephaly, bitemporal narrowing, arched eyebrows, coarse facial features, hypertelorism,



epicanthal folds, bulbous nasal tip, wide mouth with high palate and widely spaced teeth, exotropia, and curly coarse hair. She also had a short neck, small hands and feet, dystrophic nails, abnormal chubby toes, overlapping third and fourth toes, genu valgum, scoliosis, and clitoral hyperplasia. Neurologically, she was non-verbal and had severe delays, generalized hypotonia, muscle atrophy, ptosis, and hyperreflexia; she had no eye contact or tracking. The proband had a history of behavioral issues including bruxism, self-mutilation, screamed and hit herself, and easy agitation; she has shown improvement on 0.25 mg Risperadol BID as she was happy, calm, laughing, and smiling. Her skin showed scarring from self-mutilation on her upper and lower extremities; less self-mutilation was reported upon treatment.

Her gastroenterological findings included a history of feeding issues, FTT, GERD, chronic diarrhea, and liver dysfunction. Her abnormal liver function tests (LFTs) included elevated alanine transaminase (ALT, 44-343 U/L), aspartate aminotransferase (AST, 100-202 U/L), alkaline phosphatase (ALP, 209 U/L), total bilirubin (1.4-1.5 mg/dL), and direct bilirubin (0.4-0.5 mg/dL). Work-up for liver dysfunction showed that there was no evidence for autoimmune hepatitis, Wilson's disease, alpha-1 antitrypsin deficiency, or hemochromatosis. She also tested negative for celiac. Abdomen ultrasound revealed she had mild splenomegaly and a prominent left hepatic lobe; her liver Doppler ultrasound was normal. Her pruritus had substantially improved with 0.5 packet cholestyramine BID, though she is still itching. She was found to have iron, zinc, and vitamin D deficiency and was started on supplementation.

Evaluation of her other systems showed she had immunological, endocrinological, and pulmonary findings. She has had a history of recurrent infections including frequent urinary tract infections, otitis media, and upper respiratory tract infections, and she had been found to have a TLR signaling defect. The recurrent infections had been treated with IVIG since the age of 2

years 9 months, however the infusions were discontinued at the age of 5 as IgG levels remained within normal. Evaluation of her endocrine system showed that she had transient central hypothyroidism and vitamin D deficient rickets. She also had asthma, chronic respiratory insufficiency, sleep apnea, and sleep disturbances.

A brain MRI study at the age of 2 months showed mild hypoplasia of the cerebellum and mild prominent CSF space surround the left cerebellar hemisphere and inferior to the cerebellar vermis. There was no evidence of intracranial hemorrhage, masses, or acute ischemic changes. She had had a history of seizures and EEG abnormalities of which the former has resolved; no repeat EEGs have been performed.

All diagnostic and genetic testing prior to whole exome sequencing had been unrevealing. The proband had a normal karyotype and SNP microarray. Comprehensive sequencing was performed for Noonan, LEOPARD, cardiofaciocutaneous, and Costello syndromes at GeneDx (*KRAS*, *HRAS*, *PTPN11*, *NRAS*, *MAP2K1*, *RAF1*, *SOS1*, *SHOC2*) for which she tested negative. Testing for congenital disorders of glycosylation (CDGs), including N-glycan structural analysis and carbohydrate deficient transferrin, was negative.

Her mother and father were non-consanguineous Old Order Amish from Kansas and Iowa, respectively. The proband had three healthy brothers (3: II-1, 3: II-2, and 3: II-5) and 2 healthy sisters (3: II-4 and 3: II-7), however there have been two miscarriages at 6 and 8 weeks of gestation. One brother (3: II-3) passed away at 3.5 months old due to aspiration pneumonia; he had unilateral cleft lip and palate, FTT, breathing problems, and dark curly hair similar to the proband. Another brother (3: II-6) was a stillborn at 7 months of gestation; he had bilateral cleft lip and palate and dark curly hair similar to the proband. A maternal uncle passed away at 9 weeks old due to kidney failure; he was reported to have similar dark curly hair.

#### **Proband 4**

Proband 4 was an Amish female first seen at The Community Health Clinic (Topeka, IN) at the age of 6 years 6 months. She was born to a 22-year-old G1P0 mother. The mother had a bicornuate uterus, but she had an uncomplicated pregnancy until 7 months of gestation when the fetus was noted to have bradycardia. Her mother was treated with steroids due to possible premature labor. During the pregnancy, the mother smoked approximately 5 cigarettes per day and she had 2-3 alcoholic beverages approximately 3 times per week for first 4 weeks of pregnancy. She denied drug use. Proband 4 was born at 41 weeks of gestation via emergency Caesarean section at Goshen General Hospital. Her birth weight was 2835 grams (6 lbs 4oz), her length was 47 cm, and her head circumference was 33 cm. At birth, she was transferred to the NICU at Memorial Hospital (South Bend, IN) for 5 days due to episodes of oxygen desaturation and poor feeding. At 1 year 6 months, she had a G-tube placed due to FTT. At 2 years 6 months, she had a tonsillectomy and ear tubes due to recurrent otitis media. At 3 years, she had surgery on her left foot to release and lengthen her tendon. At 7 years, a hiatal hernia repair and Nissen fundoplication were performed. She was placed on PediaSure Enteral Formula with Fiber.

Physical examination showed the proband had microcephaly, bitemporal narrowing, coarse features, bushy eyebrows, synophrys, full lips, high arched palate, small widely spaced teeth, and curly red hair. She also had a short neck, pectus excavatum, hypoplastic nipples, hypermobile joints, small feet with overlapping toes, bilateral congenital talipes equinovarus, and hip dysplasia. Neurologically, the proband was severely globally developmentally delayed with hypotonia, poor head control, muscle atrophy, and hyperreflexia; she had no eye contact or tracking. She was non-verbal but would answer “yah” and also made sounds sometimes like

“ma” and “da”. She also had a history of behavioral issues including bruxism, self-mutilation, and hitting herself or clapping when excited. Her skin showed scarring from self-mutilation and she had multiple scratches from itching. A vision examination revealed that she had hyperopia, pinguecula, hypertropia, and bilateral ptosis. She tested normal for hearing.

The proband’s gastroenterological findings included a history of feeding issues, FTT, GERD, chronic diarrhea, and liver dysfunction. Her abnormal LFTs included elevated ALT (25-69 U/L), AST (22-62 U/L), and ALP (308 U/L). Her recent bile acids profile at 10 years of age on cholestyramine showed she had high cholic acid (11.2  $\mu\text{mol/L}$ ), chenodeoxycholic acid (5.9  $\mu\text{mol/L}$ ), and total bile acids (19.0  $\mu\text{mol/L}$ ). A gallbladder ultrasound at 9 years of age showed that she had a single large gallbladder stone without secondary evidence of acute cholecystitis. She was placed on 0.5 packet cholestyramine BID as well as Bactrim (sulfamethoxazole-trimethoprim), Dilaudid (hydromorphone), and Tylenol (acetaminophen) for her severe pruritus. She showed improvement on cholestyramine.

A brain MRI at showed that she had minimal prominence of the cerebral sulci and minimal ventricular enlargement. MR spectroscopy showed she had global white matter paucity. There was no evidence of a demyelinating or dysmyelinating condition or focal insult. Her overlying cortical thickness and sulcation were normal. Although her EEG was abnormal, these abnormalities were not associated with clinical seizure activity.

All diagnostic and genetic testing prior to whole exome sequencing had been unrevealing. The proband had a normal karyotype and SNP microarray, though SNP array showed a number of regions of allelic homozygosity (ROH) that were larger than 5 Mb in size with a total of 57.2 Mb of ROH. Targeted testing for Byler disease (*ATP8B1*), ITCH deficiency (*ITCH*), and GM3 synthase deficiency (*ST3GAL5*); all of which were negative. Testing for Rett

syndrome (*MECP2*) and Prader-Willi syndrome were also negative. Mitochondrial DNA content testing on muscle and liver biopsies, electron transport chain enzyme analysis on skeletal muscle, as well as mitochondrial DNA sequencing were all normal. Testing for CDGs was negative. A cholestasis panel (EGL Genetics, Tucker, GA) detected one pathogenic variant in *POLG* (c.[752C>T;1760C>T], p.[(Thr251Ile;Pro587Leu)]), however a second reportable variant was not identified.

Her mother and father were non-consanguineous Amish from Oklahoma/Indiana and Indiana, respectively. The proband had three healthy siblings (4: II-2, 4: II-3, and 4: II-4) and she is the only affected individual in her family.

SUPPLEMENTAL FIGURES

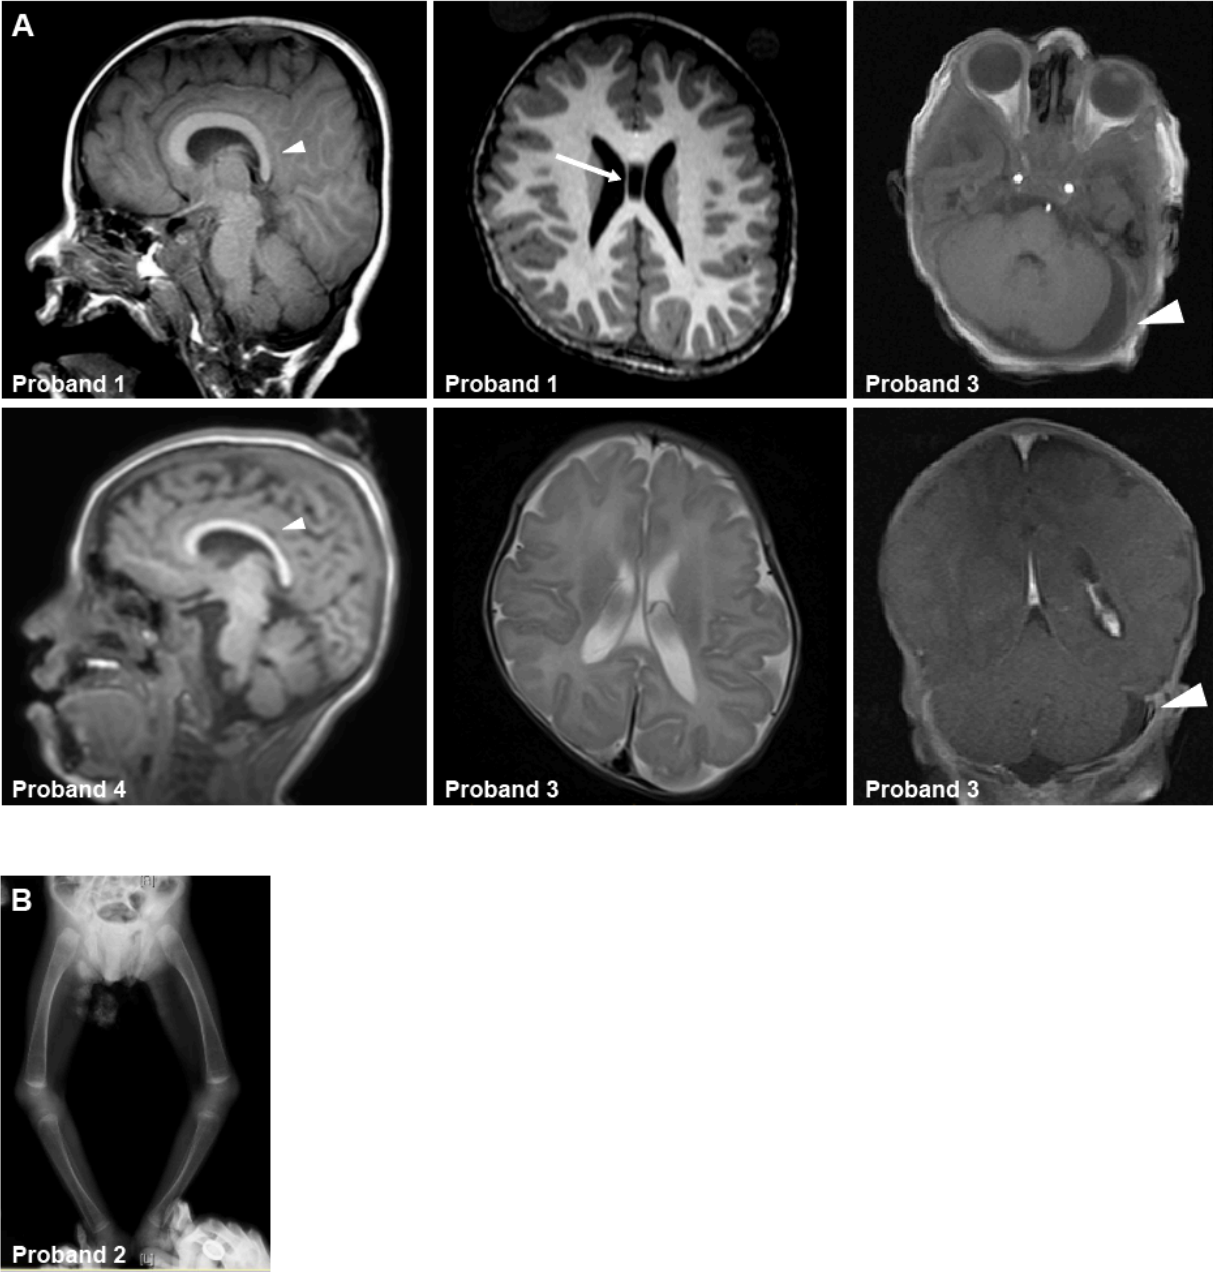

**Figure S1.** Radiographs of individuals with bi-allelic loss-of-function *CCDC47* variants. (A) Brain MRIs of Probands 1, 3, and 4. Note the thin corpus callosum in Probands 1 and 4 (small white arrowheads in the sagittal plane, left panels), cerebral atrophy in Probands 1 and 3 (transverse plane, center panels), and mild prominence of the third ventricle in Proband 1 (white arrow in the transverse plane, center upper panel). There is a stable mild prominence of cerebrospinal fluid surrounding the left cerebellar hemisphere in Proband 3 (large white arrowheads in the transverse and coronal planes, right panels). (B) An x-ray of the lower extremities of Proband 2 shows evidence of osteoporosis.

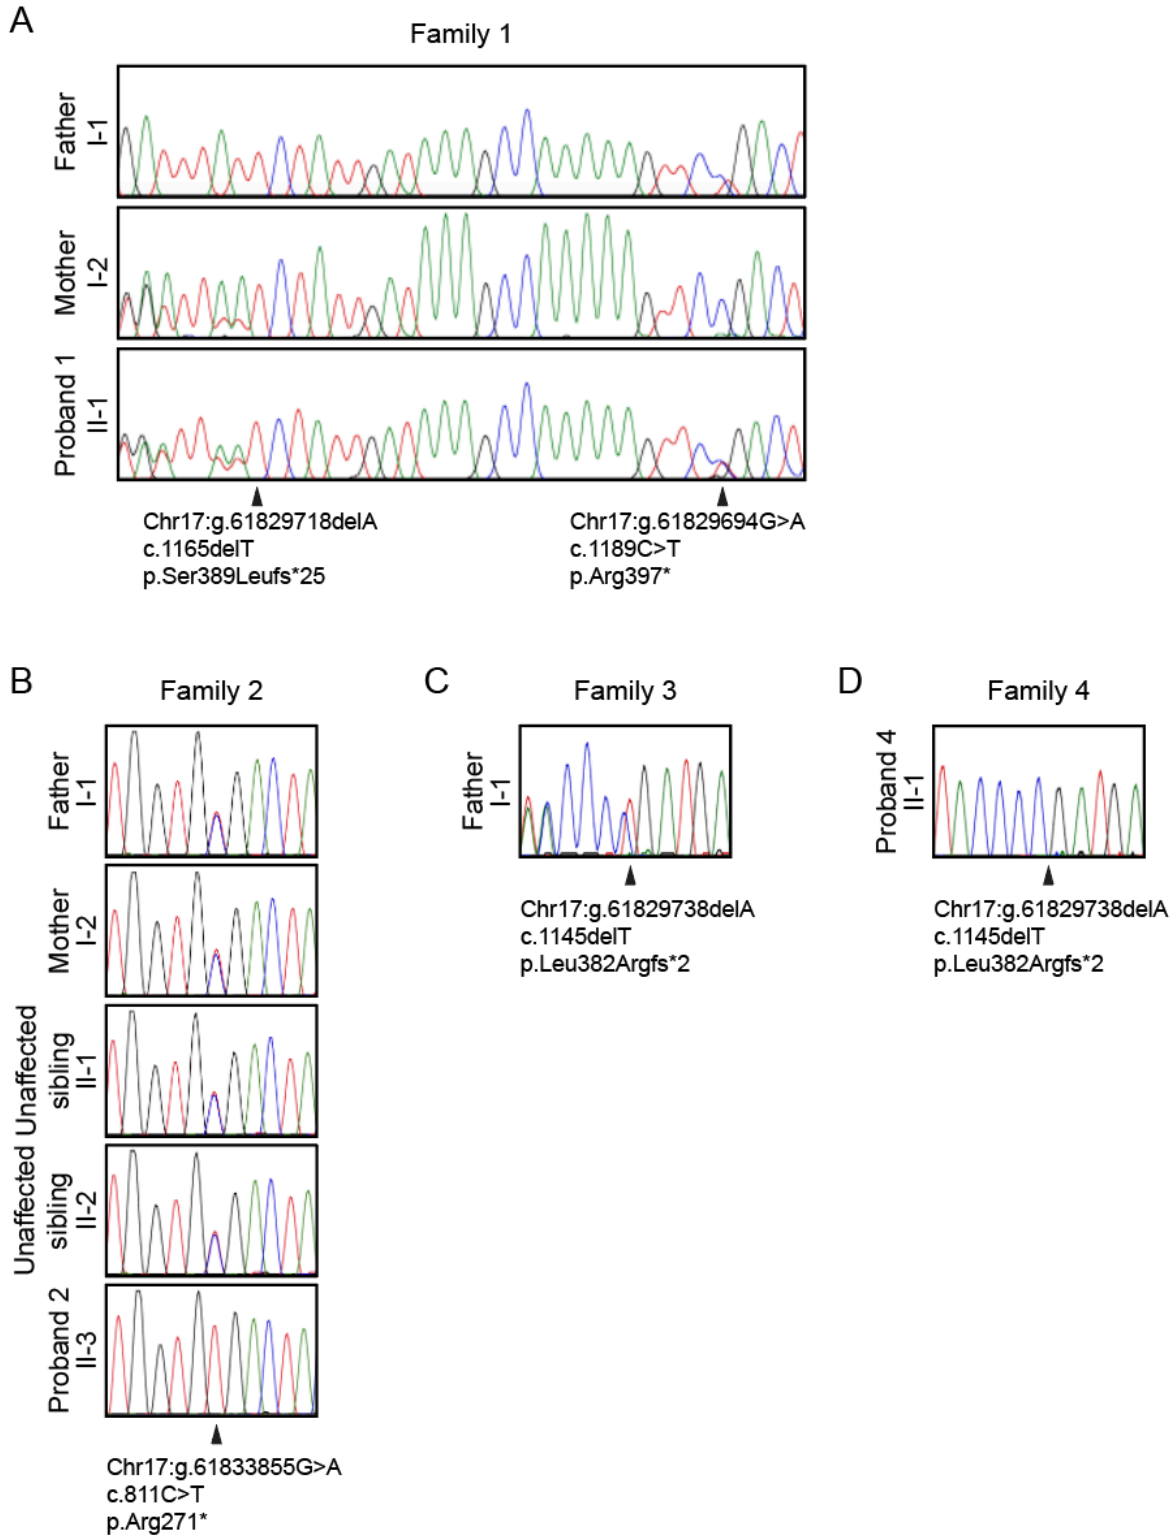

**Figure S2. Sanger sequencing chromatograms of the four probands with bi-allelic variants in *CCDC47* (NM\_020198.2).** (A) Proband 1 has a paternally inherited c.1189C>T variant and a maternally inherited c.1165delT variant in *CCDC47*. (B) Proband 2 has a homozygous c.811C>T variant in *CCDC47*. Probands 3 (C) and 4 (D) have a homozygous c.1145delT variant in *CCDC47*.

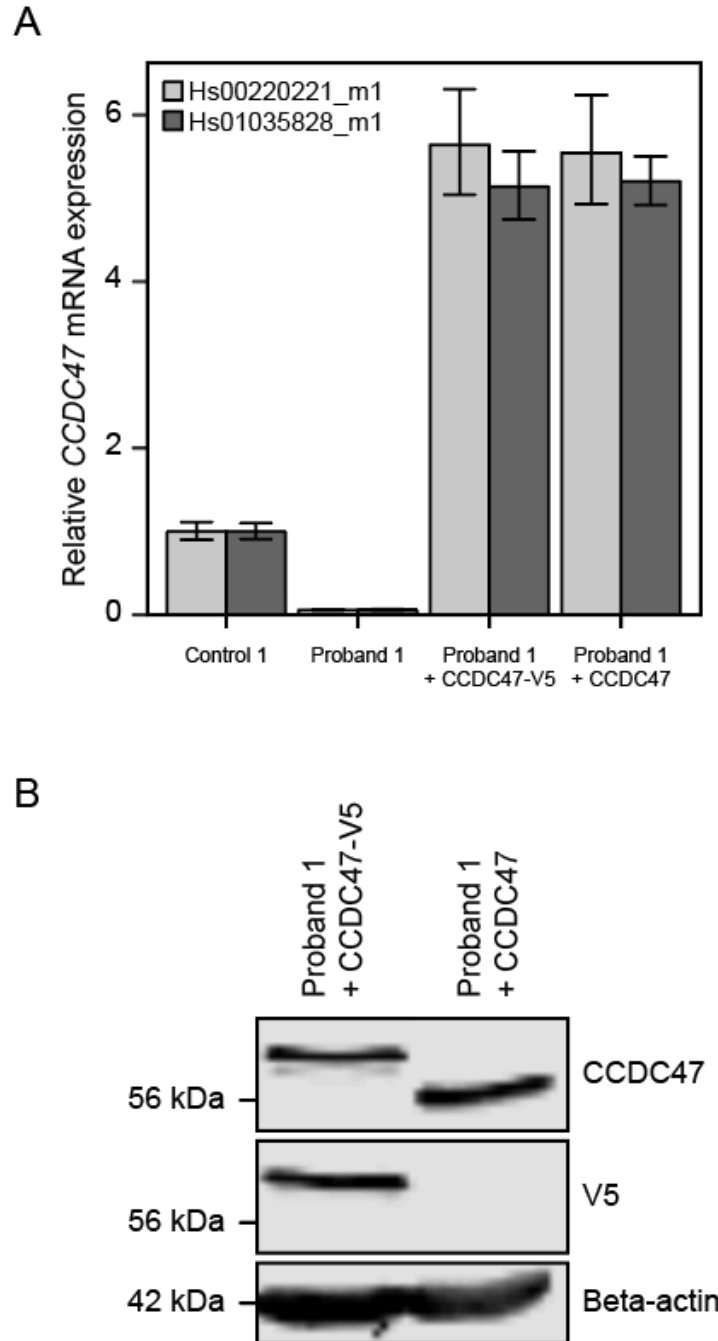

**Figure S3. Wild type *CCDC47* mRNA was overexpressed in Proband 1 fibroblasts by lentiviral transduction of pLenti6.3-*CCDC47*-V5 and pLenti6.3-*CCDC47*.** (A) Relative *CCDC47* mRNA expression analysis by TaqMan assay in unaffected control, Proband 1, and Proband 1 rescued fibroblasts expressing V5-tagged and untagged *CCDC47* mRNA. Data are presented as the mean of 3 technical replicates relative to control 1. Expression of *HPRT1* and *POLR2A* were used as internal controls to normalize gene expression; error bars represent one standard deviation. (B) *CCDC47* protein level analysis by western blot in rescued Proband 1 fibroblasts expressing V5-tagged *CCDC47* and untagged *CCDC47*.



A

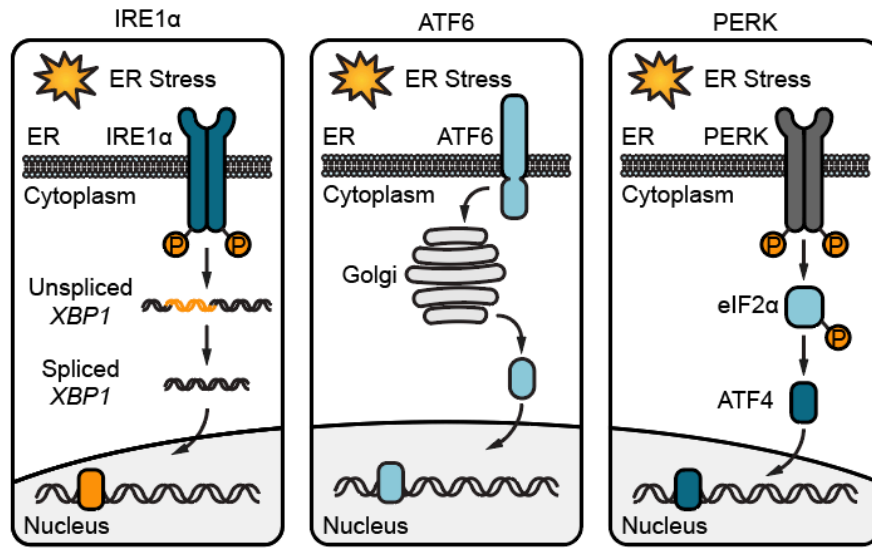

B

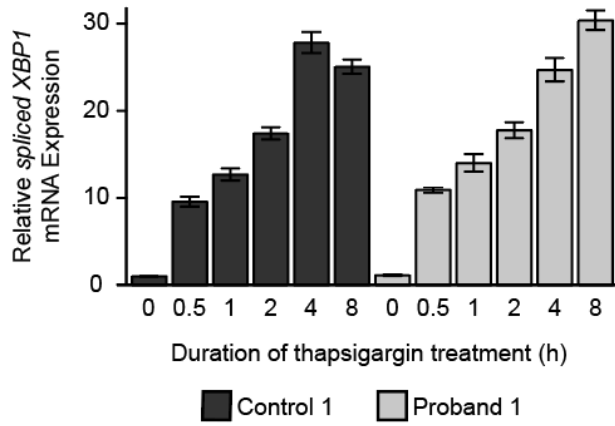

C

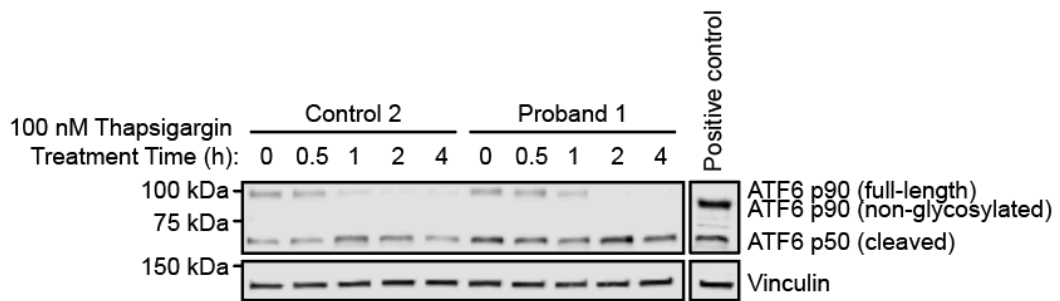

D

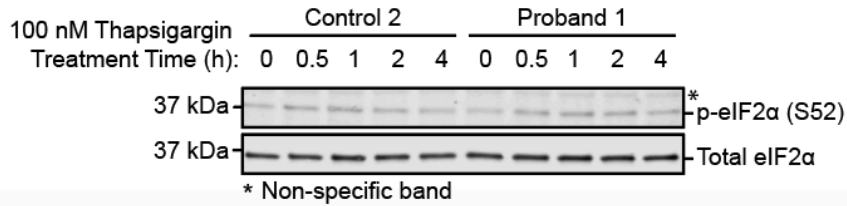

**Figure S4. The unfolded protein response (UPR) is comparably initiated in Proband 1 fibroblasts compared to unaffected control.** (A) Schematic of the three arms of the UPR including the IRE1 $\alpha$ , ATF6, and PERK pathways. Endoplasmic reticulum (ER) stress leads to IRE1 $\alpha$  phosphorylation and subsequent splicing of *XBP1* that is translated into a transcription factor which is translocated into the nucleus (left panel) and/or the cleavage of ATF6 into a transcription factor which is translocated into the nucleus (center panel) and/or the phosphorylation of PERK and eIF2 $\alpha$  that lead to the activation of ATF4 transcription factor which is translocated into the nucleus (right panel) to induce the transcription of UPR target genes. (B) *XBP1* splicing assay by quantitative PCR analysis to assess the IRE1 $\alpha$  pathway upon ER stress with 100 nM thapsigargin for 0, 0.5, 1, 2, 4, or 8 hours in unaffected control and Proband 1 fibroblasts. Data are presented as the mean of 4 technical replicates relative to 0 hours for each sample. Expression of *TBP* was used as the internal control to normalize gene expression; error bars represent one standard deviation. (C) Cleaved ATF6 (p50) protein levels were analyzed by western blot to assess the ATF6 pathway upon ER stress with 100 nM thapsigargin for 0, 0.5, 1, 2, or 4 hours. The positive control is unaffected control fibroblasts treated with 10  $\mu$ g/ml tunicamycin for 16 hours; the non-glycosylated ATF6 p90 is observed as tunicamycin is an inhibitor of glycosylation and the cleaved ATF6 p50 is observed as expected. (D) Phosphorylated eIF2 $\alpha$  (S52) protein levels were analyzed by western blot to assess the PERK pathway upon ER stress with 100 nM thapsigargin for 0, 0.5, 1, 2, or 4 hours.

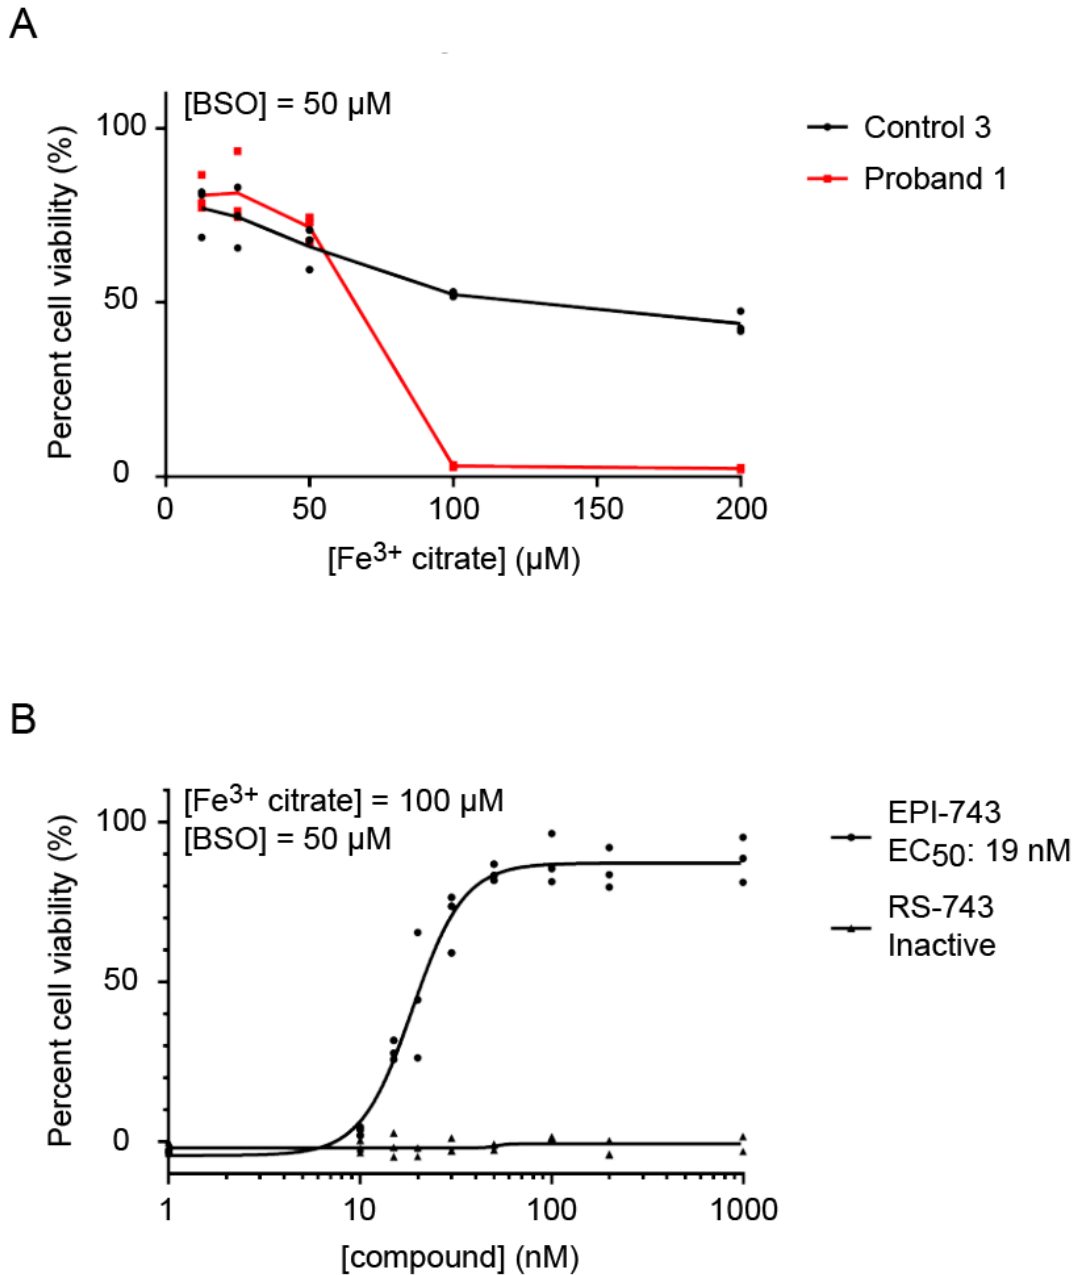

**Figure S5. Proband 1 fibroblasts have increased susceptibility to oxidative stress and the antioxidant compound EPI-743 rescues the fibroblasts from oxidative stress-induced cell death.** (A) Proband 1 fibroblasts have increased susceptibility to oxidative stress as shown by increased cell death upon treatment with a fixed concentration of 50  $\mu$ M of the glutathione synthesis inhibitor L-buthionine-(*S,R*)-sulfoximine (BSO) for 48 hours and increasing concentrations of Fe<sup>3+</sup> citrate compared to unaffected control fibroblasts. (B) Treatment with increasing concentrations of the antioxidant compound EPI-743 or its redox-silent analog RS-743 demonstrates the rescue of Proband 1 fibroblasts from oxidative stress-induced cell death under 100  $\mu$ M Fe<sup>3+</sup> citrate and 50  $\mu$ M BSO challenge conditions. Abbreviations: EC<sub>50</sub>, half maximal effective concentration.

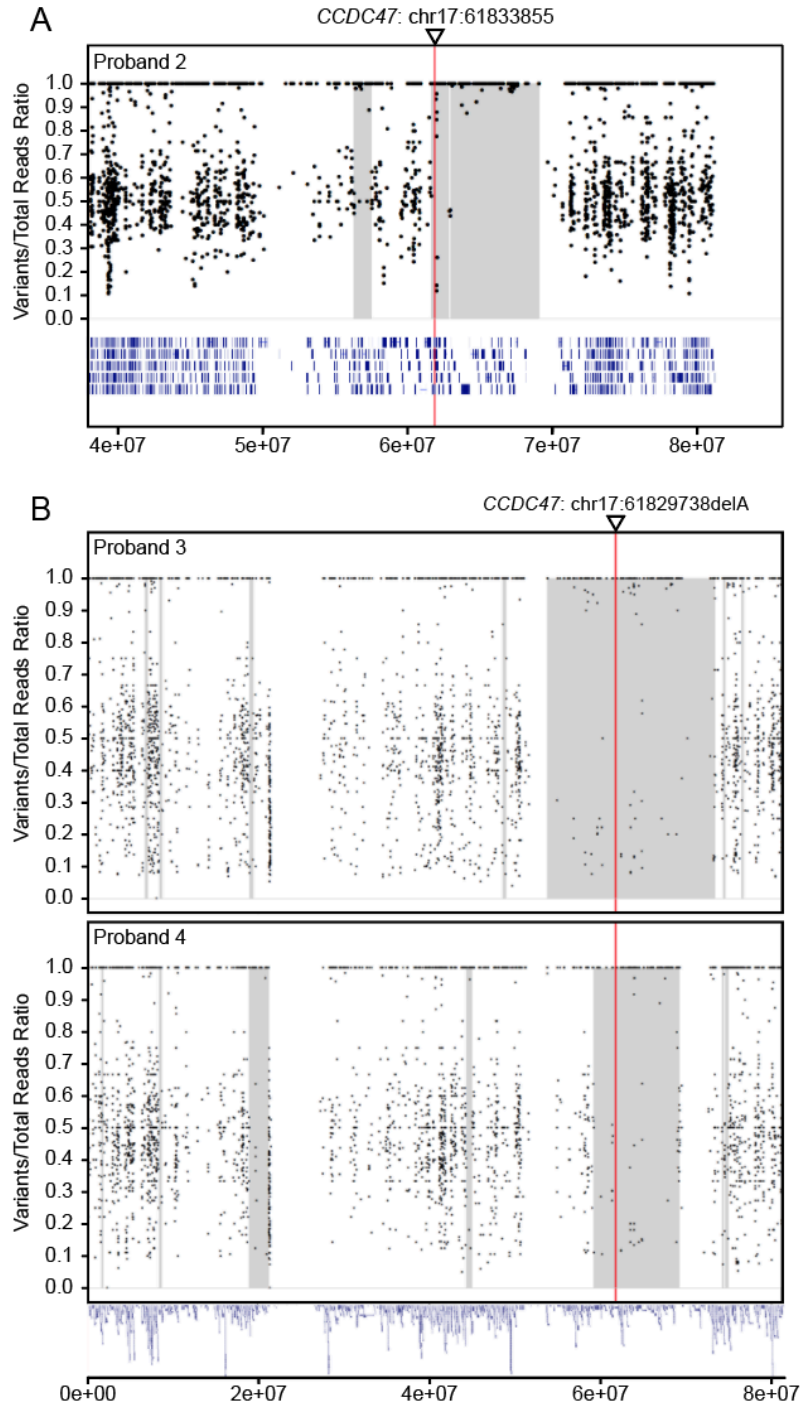

**Figure S6. Absence of heterozygosity (AOH) analyses for Probands 2, 3, and 4.** The homozygous variant NM\_020198.2:c.811C>T in Proband 2 is located within a region of AOH. (B) The homozygous frameshift variant NM\_020198.2:c.1145delT in Probands 3 and 4 is located within a region of AOH. The regions of AOH (grey blocks) were determined by B-allele frequency calculated by the ratio of variant to total reads from WES data at each base position. The homozygous *CCDC47* variants in each individual are located within a region of AOH on Chromosome 17, marked by a red line.

## SUPPLEMENTAL TABLES

**Table S1.** TaqMan gene expression assays used in this study.

| <b>Gene</b>   | <b>Assay ID</b> | <b>Exon Boundary</b>                          |
|---------------|-----------------|-----------------------------------------------|
| <i>CCDC47</i> | Hs01035828_m1   | 8-9                                           |
| <i>CCDC47</i> | Hs00220221_m1   | 12-13                                         |
| <i>HPRT1</i>  | Hs02800695_m1   | 2-3                                           |
| <i>POLR2A</i> | Hs00172187_m1   | 1-2                                           |
| <i>TBP</i>    | Hs00427620_m1   | 2-3 for NM_001172085.1<br>3-4 for NM_003194.4 |

**Table S2.** Oligonucleotide primers used in this study.

| <b>Primer Name</b>       | <b>Primer Sequence (5' to 3')</b> | <b>Application</b>                                                               |
|--------------------------|-----------------------------------|----------------------------------------------------------------------------------|
| XBPI(S)-F                | TGCTGAGTCCGCAGCAGGTG              | <i>XBPI</i> splicing assay                                                       |
| XBPI(S)-R                | GCTGGCAGGCTCTGGGGAAG              | <i>XBPI</i> splicing assay                                                       |
| TBP-F                    | CCAAGAGTGAAGAACAGTCCAG<br>A       | <i>XBPI</i> splicing assay                                                       |
| TBP-R                    | ACTTCACATCACAGCTCCCC              | <i>XBPI</i> splicing assay                                                       |
| CCDC47-cloning-F         | CACCATGAAAGCCTTCCACACT            | PCR amplification of <i>CCDC47</i> ORF for cloning                               |
| CCDC47-cloning-stop-R    | TTACATGGCTTTCACCTTTGATTTG<br>TT   | PCR amplification of <i>CCDC47</i> ORF (with stop codon) for cloning             |
| CCDC47-cloning-no stop-R | GCCCATGGCTTTCACCTTTGAT            | PCR amplification of <i>CCDC47</i> ORF (without stop codon, glycine) for cloning |
| M13(-20)-mod-F           | GTTGTAAAACGACGGCCAGTC             | Sequence validation for pENTR-CCDC47                                             |
| CCDC47-M13-R             | CCTCCTGGGTATCTGCATCTTC            | Sequence validation for pENTR-CCDC47                                             |
| CCDC47-Inner-F           | ACCACTGTGGAGTTGGAAGG              | Sequence validation for pENTR-CCDC47 and pLenti6.3-CCDC47                        |
| CCDC47-Inner-R           | AAAGAGTCCGGCAGTCCATA              | Sequence validation for pENTR-CCDC47 and pLenti6.3-CCDC47                        |
| CCDC47-T7-F              | GGAAAGCCTTGGTGCGACTA              | Sequence validation for pENTR-CCDC47                                             |
| T7-mod-R                 | CATGTAATACGACTCACTATAGG<br>GGAT   | Sequence validation for pENTR-CCDC47                                             |
| CMV-mod-F                | CAAATGGGCGGTAGGCGT                | Sequence validation for pLenti6.3-CCDC47                                         |
| CCDC47-CMV-R             | CCTCCTGGGTATCTGCATCTTC            | Sequence validation for pLenti6.3-CCDC47                                         |
| CCDC47-V5-F              | ATTTGCTGTTGGCACACGGA              | Sequence validation for pLenti6.3-CCDC47                                         |
| V5-R                     | ACCGAGGAGAGGGTTAGGGAT             | Sequence validation for pLenti6.3-CCDC47                                         |

Abbreviations: F, forward; R, reverse.

**Table S3.** Antibodies used in this study.

| <b>Antibody</b>                      | <b>Application</b> | <b>Dilution</b> | <b>Catalog No.</b> | <b>Company</b>                         |
|--------------------------------------|--------------------|-----------------|--------------------|----------------------------------------|
| anti- $\beta$ -actin                 | WB                 | 1:50,000        | ab6276             | Abcam                                  |
| anti-ATF6                            | WB                 | 1:1,000         | 24169-1-AP         | Proteintech                            |
| anti-calnexin                        | IF                 | 1:100           | MAB3126            | EMD Millipore                          |
| anti-CCDC47<br>(C-terminus)          | WB                 | 1:250           | HPA029674          | Sigma-Aldrich                          |
| anti-CCDC47<br>(C-terminus)          | IF                 | 1:200           | HPA029674          | Sigma-Aldrich                          |
| anti-CCDC47<br>(N-terminus)          | WB                 | 1:2,000         | A305-100A          | Bethyl Laboratories                    |
| anti-phospho-<br>eIF2 $\alpha$ (S52) | WB                 | 1:250           | 07-760-I           | EMD Millipore                          |
| anti-total eIF2 $\alpha$             | WB                 | 1:1,000         | #5324              | Cell Signaling<br>Technology           |
| anti-vinculin                        | WB                 | 1:2,000         | V9131              | Sigma-Aldrich                          |
| anti-V5                              | WB                 | 1:2,500         | R960-25            | Invitrogen/Thermo<br>Fisher Scientific |

Abbreviations: IF, immunofluorescence; WB, western blot.

**Table S4.** Summary of additional candidate variants identified in the four probands.

| Proband | Gene               | Nucleotide Change            | Coding Sequence Change      | Amino Acid Change                         | Inheritance           | Parent of Origin | gnomAD All | CADD Phred Score |
|---------|--------------------|------------------------------|-----------------------------|-------------------------------------------|-----------------------|------------------|------------|------------------|
| 1       | <i>UBE2V2</i>      | Chr8:g.48962412_48962415 del | NM_003350.2:c.166-1_168del* | Exon 3 skipping (empirical determination) | <i>de novo</i>        | None             | 0.000%     | 32               |
| 1       | <i>TAF1A</i>       | Chr1:g.222732051C>T          | NM_001201536.1:c.1304G>A    | p.(Arg435Glu)                             | Compound heterozygous | M                | 0.548%     | 17.83            |
|         |                    | Chr1:g.222737470G>A          | NM_001201536.1:c.895-3C>T   | NA                                        |                       | P                | 0.328%     | 13.81            |
| 1       | <i>BCDIN3D-AS1</i> | Chr12:g.50222535C>G          | NR_027500.1:n.202+8C>G      | NA                                        | Homozygous            | Both             | 0.633%     | 12.46            |
| 2       | <i>PFKFB2</i>      | Chr1:g.207244919G>T          | NM_006212.2:c.1350+1G>T     | NA                                        | Homozygous            | Both             | 0.002%     | 25.4             |
| 2       | <i>LUM</i>         | Chr12:g.91498052A>G          | NM_002345.3:c.907T>C        | p.(Tyr303His)                             | Homozygous            | Both             | 0.000%     | 24.9             |
| 2       | <i>SEC16A</i>      | Chr9:g.139342104G>A          | NM_014866.1:c.6476C>T       | p.(Ser2159Leu)                            | Homozygous            | Both             | 0.004%     | 23               |
| 2       | <i>ACSL4</i>       | ChrX:g.108912383T>C          | NM_004458.2:c.1022A>G       | p.(Tyr341Cys)                             | Hemizygous            | M                | 0.000%     | 21.3             |
| 2       | <i>MXRA5</i>       | ChrX:g.3239651C>A            | NM_015419.3:c.4075G>T       | p.(Val1359Phe)                            | Hemizygous            | M                | 0.005%     | 18.45            |
| 3       | <i>ZNF780A</i>     | hg38.chr19: 40074802T>G      | NM_001142578:c.1640A>C      | p.(His547Pro)                             | <i>de novo</i>        | NA               | 0.000%     | 25.9             |
| 3       | <i>GOLGA3</i>      | hg38.chr12: 132807915C>T     | NM_001172557:c.1154G>A      | p.(Ser385Asn)                             | Homozygous            | Both             | 0.000%     | 25.8             |
| 3       | <i>ABCA6</i>       | hg38.chr17: 69106070C>T      | NM_080284:c.2531G>A         | p.(Arg844His)                             | Homozygous            | Both             | 0.000%     | 15.26            |
| 3       | <i>TUBGCP5</i>     | hg38.chr15 23003072T>C       | NM_052903:c.2920A>G         | p.(Thr974Ala)                             | Homozygous            | Both             | 0.000%     | NA               |
| 3       | <i>GNAI1</i>       | hg38.chr7: 80199301T>C       | NM_002069:c.380T>C          | p.(Ile127Thr)                             | Homozygous            | Both             | 0.002%     | 24.3             |
| 4       | <i>ANXA9</i>       | hg38.chr1: 150987933G>C      | NM_003568:c.674G>C          | p.(Arg225Pro)                             | <i>de novo</i>        | NA               | 0.000%     | 32               |
| 4       | <i>LRRK1</i>       | hg38.chr15:101010676A>G      | NM_024652:c.1120A>G         | p.(Thr374Ala)                             | Compound heterozygous | M                | 0.000%     | 23               |
|         |                    | hg38.chr15: 101065877G>A     | NM_024652:c.5440G>A         | p.(Ala1814Thr)                            |                       | P                | 0.003%     | 18.55            |

Abbreviations: CADD, Combined Annotation Dependent Depletion; gnomAD, Genome Aggregation Database; M, maternal; NA, not applicable; P, paternal.



## **SUPPLEMENTAL METHODS**

### **Enrollment and consent**

Proband 1 was evaluated through the National Institutes of Health Undiagnosed Diseases Program and was enrolled in the protocol 76-HG-0238, approved by the National Human Genome Research Institute Institutional Review Board. Her mother provided written informed consent.

Proband 2 was clinically diagnosed at Dr. Sami Ulus Research and Training Hospital of Women's and Children's Health and Diseases and enrolled in the protocol H-29697, approved by Baylor College of Medicine Institutional Review Board. His parents and two siblings provided written informed consent.

Probands 3 and 4 were clinically assessed and followed at The Community Health Clinic (Topeka, IN) and were recruited for research studies through the Clinic for Special Children under a Lancaster General Hospital Institutional Review Board approved protocol. Probands 3 and 4 were also enrolled in the protocol 76-HG-0238, approved by the National Human Genome Research Institute Institutional Review Board for sample collection and molecular analyses. Their parents provided written informed consent.

### **Isolation and culture of primary cells**

Primary dermal fibroblast cells from Probands 1, 3, and 4 were cultured from forearm skin biopsies. Unaffected pediatric sex-matched primary dermal fibroblast cell lines GM01651 (Control 1), GM01652 (Control 2), and GM00038 (Control 3) (Coriell Institute for Medical Research, Camden, NJ) were used as controls. Fibroblasts were cultured in high glucose DMEM (11965092, Gibco/Thermo Fisher Scientific, Gaithersburg, MD) with 10% fetal bovine serum

(FBS, 10082, Gibco/Thermo Fisher Scientific, Gaithersburg, MD) and 1× antibiotic-antimycotic (15240, Gibco/Thermo Fisher Scientific, Gaithersburg, MD) (complete DMEM) at 37°C with 5% CO<sub>2</sub>.

Lymphoblastoid cell lines were established from the peripheral blood samples of Proband 2 and his father and unaffected sibling by transformation with Epstein-Barr virus (EBV)-containing supernatant as previously described.<sup>1</sup>

Lymphoblastoid cells were cultured in RPMI 1640 Medium with GlutaMAX Supplement (61870036, Gibco/Thermo Fisher Scientific, Gaithersburg, MD) containing 10% FBS (10082, Gibco/Thermo Fisher Scientific, Gaithersburg, MD) and 1× antibiotic-antimycotic (15240, Gibco/Thermo Fisher Scientific, Gaithersburg, MD) (complete RPMI) at 37°C with 5% CO<sub>2</sub>.

### **Whole exome sequencing analysis**

Whole exome sequencing analysis was performed on the probands and their parents at 3 centers: Proband 1 at the National Institutes of Health Intramural Sequencing Center (NISC), Proband 2 through the Baylor-Hopkins Center for Mendelian Genomics (BHCMG), and Probands 3 and 4 at the Regeneron Genetics Center through the collaboration with the Clinic for Special Children.

With respect to the identification of potential collaborators who had identified *CCDC47* as a candidate gene and from the perspective of the National Institutes of Health, we initially submitted *CCDC47* to GeneMatcher, an online tool for connecting researchers with an interest in the same gene;<sup>2</sup> no additional cases with a similar constellation of phenotypic features and rare variation in *CCDC47* were identified. We next contacted Jill A. Mokry at the Baylor College of Medicine to look through the Baylor-Hopkins Center for Mendelian Genetics (BHCMG) database, which facilitated the collaboration with the Lupski Lab and identification of Proband 2.

Finally, identification of Probands 3 and 4 were the result of a serendipitous conversation while Dr. Kevin A. Strauss from the Clinic for Special Children was visiting the Undiagnosed Diseases Program.

Peripheral whole blood samples were collected from Proband 1 and her parents. DNA was extracted using the AutoGen FLEX STAR automated genomic DNA extraction and isolation system. The DNA samples were purified by phenol-chloroform extraction and sent to the NISC for whole exome sequence analysis. Sequencing libraries with approximately 300 bp inserts and paired-end index adapters were prepared and enriched for targeted whole exome regions using the TruSeq DNA Sample Prep Kit v1 (Illumina, San Diego, CA) and sequenced on the HiSeq 2000 Sequencing System (Illumina, San Diego, CA) for 101-bp paired-end reads. The sequencing reads then were filtered for quality and aligned to human reference genome NCBI build 37 (hg19) using pipeline developed by the Undiagnosed Diseases Program (UDP), one based on NovoAlign (Novocraft Technologies, Petaling Jaya, Malaysia), and separately, a diploid aligner<sup>3</sup> that was run on a commercial platform (Appistry Inc., St. Louis, MO). Variants were called with HaplotypeCaller and GenotypeGVCFs.<sup>4-6</sup> Variants were annotated using snpEff<sup>7</sup> and a combination of publicly available data sources (ExAC, ESP, 1000Genomes, see URLs) and internal cohort statistics. These annotations were utilized in the variant analysis method developed at the UDP in which rare, non-synonymous, start-gain/loss, stop-gain/loss, frameshift, canonical splice site variants and intronic variants ( $\pm 20$  bp) that were consistent with homozygous recessive, compound heterozygous, X-linked or *de novo* dominant disease models were retained. These variants were manually inspected using the Integrative Genomics Viewer (IGV) and checked for publicly available clinical or functional data in OMIM, HGMD, and PubMed. Variants were interpreted and prioritized based on the clinical relevance of the gene

and the pathogenicity of the variants using the ACMG-AMP guidelines.<sup>8</sup> In the absence of candidate variants with unambiguous clinical relevance such as those in the majority of UDP cases and in this case in particular, variants were prioritized by inferred significance based on Mendelian consistency, population frequency, and predicted deleteriousness, coalesced with published biological and functional data of the genes.

Whole exome sequencing was performed on Proband 2 and his sibling (2: II-1) at Baylor College of Medicine Human Genome Sequencing Centre (BCM-HGSC) through the Baylor-Hopkins Center for Mendelian Genomics (BHCMG) initiative using previously described procedure.<sup>9</sup> In brief, peripheral blood samples were collected from Proband 2, his parents and two unaffected siblings. Genomic DNA was extracted from the blood samples using the Gentra PureGene Blood Kit (Qiagen Sciences Inc., Germantown, MD). The sequencing libraries were constructed using the SeqCap EZ HGSC VCRome Kit (Roche NimbleGen) with the VCRome 2.1 exome capture design and sequenced on the HiSeq 2500 Sequencing System (Illumina, San Diego, CA) with  $\sim 100\times$  depth of coverage. Sequencing data processing and variant annotation were performed using the Mercury pipeline.<sup>10</sup> Variants were evaluated based on a homozygous recessive, compound heterozygous or *de novo* dominant disease model with a minor allelic frequency (MAF) less than 0.001, 0.0005 and 0.0001 accordingly within the BHCMG in-house database, NHLBI Exome Sequencing Project Exome Variant Server (ESP 5400), 1000 Genomes, and the Exome Aggregation Consortium (ExAC) Browser.

We performed family whole exome sequencing for Probands 3 and 4, their unaffected parents and all available unaffected siblings. Genomic DNA was extracted from peripheral blood samples and submitted for whole exome sequencing in collaboration with the Regeneron Genetics Center (RGC). Fluorescence-based quantification was performed to ensure appropriate

DNA quantity and quality for sequencing purposes. One  $\mu\text{g}$  of DNA was sheared to an average fragment length of 150 base pairs (Covaris LE220) and prepared for exome capture with a custom reagent kit from Kapa Biosystems. Samples were captured using the IDT xGen exome capture reagent (Integrated DNA Technologies, Coralville, IA). Samples were barcoded, pooled, and multiplexed using 75 bp paired-end sequencing on an Illumina HiSeq 2500 with v4 chemistry (Illumina, San Diego, CA). Captured fragments were sequenced to achieve a minimum of 85% of the target bases covered at 20 $\times$  or greater coverage. Following sequencing, data was processed using a cloud-based pipeline developed at the RGC that uses DNAnexus and AWS to run standard tools for sample-level data production and analysis. Sequence reads were mapped and aligned to the GRCh38/hg38 human genome reference assembly using BWA-mem. After alignment, duplicate reads were marked and flagged. SNP and INDEL variants and genotypes were called using GATK's HaplotypeCaller. Called variants were further analyzed using an RGC implemented bioinformatics pipeline for family-based analyses as previously reported.<sup>11</sup> Briefly, standard quality-control filters (read depth  $\geq 10$ , genotype quality  $\geq 30$ , allelic balance  $\geq 20\%$ ) were applied to called variants. Passing variants were classified and annotated based on their potential functional effects using RefSeq and ENSEMBL75 transcripts. We verified familial relationships through identity-by-descent (IBD) derived metrics from genetic data to infer relatedness and relationships in our cohort using PRIMUS<sup>12</sup> and cross-referencing with reported pedigrees. Variants were subsequently annotated and filtered by their observed frequencies in population control databases such as dbSNP, the 1000 Genomes Project, the NHLBI Exome Sequencing Project, the Exome Aggregation Consortium Database (ExAC), and internal RGC databases in order to filter out common polymorphisms and high frequency, likely benign variants. Algorithms for bioinformatic prediction of functional effects of variants, such as

LRT, PolyPhen-2, SIFT, CADD, and MutationTaster; along with conservation scores based on multiple species alignments (i.e. GERP, PhastCons, PhyloP) were incorporated as part of the annotation process of variants and used to inform on the potential deleteriousness of identified candidate variants.

Segregation with disease status in all available family members was subsequently verified for all candidate variants identified in each pedigree. Analyses were guided according to the pedigree information and the genetically verified familial relationships and structure. For Proband 3, we identified 6 candidate variants in 6 genes (5 homozygous and 1 *de novo*), however all other recessive variants had 1-8 homozygous individuals reported in population databases except for a homozygous rare frameshift mutation [hg38.chr17:63752378(delA); c.1145delT; p.(Leu382Argfs\*2)] in *CCDC47*. For Proband 4, analyses identified 4 candidate variants in 3 genes (1 homozygous, 1 compound heterozygous and 1 *de novo*). One of the compound heterozygous variants was observed in homozygosis in 10 individuals in population databases and subsequently deprioritized. The proband also was homozygous for the p.(Leu382Argfs\*2) frameshift variant. Given the predicted effect of the mutation likely leading to loss-of-function of the candidate gene and the striking phenotypic similarity between the two probands, we identified *CCDC47* as the main candidate for the phenotype in these individuals.

All candidate variants identified through whole exome sequencing analysis were validated by Sanger sequencing.

### **RNA extraction and reverse transcription**

Cells were homogenized using the QIAshredder (79654, Qiagen, Germantown, MD) and total RNA was extracted using the RNeasy Mini Kit (74106, Qiagen, Germantown, MD). Genomic DNA was removed by on-column DNase I digestion (79254, Qiagen, Germantown, MD).

Reverse transcription was performed using the Omniscript Reverse Transcription Kit (205111, Qiagen, Germantown, MD) using 1.5 µg total RNA per reaction according to the manufacturer's specifications.

### **Gene expression analysis**

TaqMan Gene Expression Master Mix (4369016, Applied Biosystems/Thermo Fisher Scientific, Foster City, CA) was used with the 7500 Fast Real-Time PCR System (Applied Biosystems/Thermo Fisher Scientific, Foster City, CA) for gene expression analysis. The following conditions were used for amplification: 1 cycle of 50°C for 2 min for uracil-N-glycosylase incubation, followed by 1 cycle of 95°C for 10 min for DNA polymerase activation, followed by 40 cycles of 95°C for 15 s and 60°C for 1 min for PCR amplification.

The relative quantification of gene expression was calculated using the delta-delta  $C_t$  method<sup>13</sup> using the 7500 Software version 2.3 (Applied Biosystems/Thermo Fisher Scientific, Foster City, CA). Expression of at least two of the following genes were used as the internal control: *HPRT1*, *POLR2A*, and/or *TBP*. All TaqMan assays used for gene expression analysis are presented in Table S1.

### ***XBPI* splicing assay**

Cells were treated with the sarco/endoplasmic reticulum  $Ca^{2+}$  ATPase (SERCA) inhibitor thapsigargin at a concentration of 100 nM to induce endoplasmic reticulum stress for 0, 0.5, 1, 2,

4, or 8 hours. Total RNA was extracted as described above and reverse transcription was performed as described above with 0.5 µg of total RNA per reaction.

Upon ER stress, the unfolded protein response (UPR) is activated and IRE1- $\alpha$  phosphorylation leads to splicing of the X-box binding protein 1 (*XBPI*) mRNA.<sup>14</sup> Primers specific to spliced *XBPI* mRNA<sup>15</sup> were used for quantitative PCR (Table S2). 2× QuantiFast SYBR Green PCR Master Mix (204056, Qiagen, Germantown, MD) was used with the 7500 Fast Real-Time PCR System (Applied Biosystems/Thermo Fisher Scientific, Foster City, CA) for *XBPI* splicing analysis. The following conditions were used for amplification: 1 cycle of 95°C for 5 min for DNA polymerase activation, followed by 40 cycles of 95°C for 10 s and 60°C for 30 s, followed by a melt curve analysis.

The relative quantification of gene expression was calculated as above, using *TBPI* as an internal control. All primers used for the *XBPI* splicing assay are presented in Table S2.

### **Western blot analysis**

Cells were lysed in RIPA Buffer (R0278, Sigma-Aldrich, St. Louis, MO) containing 1× Complete Protease Inhibitor Cocktail (05892970001, Roche/Sigma-Aldrich, St. Louis, MO) and 1× PhosSTOP phosphatase inhibitor (04906837001, Roche/Sigma-Aldrich, St. Louis, MO) for 15 min on ice. The samples were homogenized (Model 250 Digital Sonifier, Branson Ultrasonics, Danbury, CT) at 10% amplitude for 30 s on ice. Laemmli sample buffer was added and samples were boiled for 5 min and resolved on a 4-15% gradient polyacrylamide gel and transferred to a PVDF membrane. Membranes were blocked using Odyssey Blocking Buffer (LI-COR Biosciences, Lincoln, NE) for 1 hour at room temperature and subsequently incubated with primary antibodies diluted in Odyssey Blocking Buffer with 0.1% Tween 20 overnight at 4°C.



After four 5-min washes with PBS-T (0.1% Tween 20 in phosphate buffered saline or PBS) or TBS-T (0.1% Tween 20 in Teen-buffered saline or TBS), membranes were incubated with IRDye-conjugated secondary antibodies (LI-COR Biosciences, Lincoln, NE) for 1 hour at room temperature. After four 5-min washes with PBS-T or TBS-T, two 5-min washes with PBS or TBS were performed to remove residual Tween 20. Membranes were imaged on the Odyssey CLx Infrared Imaging System and analyzed using the CLx Image Studio version 3.1 software (LI-COR Biosciences, Lincoln, NE). All primary antibodies and dilutions used for western blot are presented in Table S3.

### **Indirect immunofluorescence**

Unaffected control and Proband 1 fibroblasts were plated at  $5 \times 10^4$  cells per well on coverslips in a 6-well plate and cultured overnight. All staining procedures were performed at room temperature unless specified otherwise. Cells were washed with PBS, then fixed with 4% paraformaldehyde (Electron Microscopy Sciences, Hatfield, PA) for 15 min, washed three times with PBS, permeabilized with 0.5% Triton X-100 in PBS for 10 min, and washed once with PBS. Endogenous peroxidases were quenched with 0.3% hydrogen peroxide in PBS for 20 min. Cells were washed with PBS, incubated with blocking buffer (5% normal goat serum, 1% bovine serum albumin in PBS) for 1 hour, and subsequently incubated with primary antibodies against CCDC47 (1:200, HPA029674, Sigma-Aldrich) and the ER marker calnexin (1:100, MAB3126, EMD Millipore) diluted in blocking buffer overnight at 4°C. After four 10-min washes with PBS, cells were incubated with Alexa Fluor-conjugated secondary antibody (1:1,000, Invitrogen/Thermo Fisher Scientific, Carlsbad, CA) to detect anti-calnexin or HRP-conjugated secondary antibody with the Tyramide Signal Amplification Kit (Invitrogen/Thermo Fisher

Scientific, Carlsbad, CA) according to the manufacturer's specifications to detect anti-CCDC47. Following four 10-min washes with 1× PBS, cells were mounted with ProLong Gold Antifade Mountant with DAPI (Invitrogen/Thermo Fisher Scientific, Carlsbad, CA) and cured for 24 hours.

Images were acquired using a 63×/1.4 oil DIC Plan-APOCHROMAT objective lens on an LSM 700 laser scanning confocal microscope (Carl Zeiss Microscopy, Jena, Germany) with the ZEN 2012 SP1 (black edition) version 8.1 software (Carl Zeiss Microscopy, Jena, Germany).

### **Ca<sup>2+</sup> imaging**

Elevation of cytoplasmic Ca<sup>2+</sup> following the addition of 2 μM thapsigargin to assess total ER Ca<sup>2+</sup> levels, 0.5 μM IP<sub>3</sub>-AM to assess Ca<sup>2+</sup> release from the ER via the inositol 1,4,5-triphosphate receptor (IP<sub>3</sub>R), 10 μM ryanodine to assess Ca<sup>2+</sup> release from the ER via the ryanodine receptor (RyR), and 0.2 μM thapsigargin to assess Ca<sup>2+</sup> leak from the ER via ion channels, including presenilin 1 and bax inhibitor 1,<sup>16,17</sup> to unaffected control fibroblasts, Proband 1, 3, 4 fibroblasts, and Proband 1 fibroblasts overexpressing wild type *CCDC47* was measured using the cell permeable Ca<sup>2+</sup> indicator Fura-2, AM (Invitrogen/Thermo Fisher Scientific, Carlsbad, CA) with an excitation at 340 and 380 nm and emission at 525 nm. Ionomycin, a selective Ca<sup>2+</sup> ionophore that raises intracellular Ca<sup>2+</sup> levels,<sup>18,19</sup> was added to check cell viability. Store-operated Ca<sup>2+</sup> entry (SOCE) was assessed by pretreatment of the cells with 2 μM thapsigargin to induce emptying of the ER Ca<sup>2+</sup> store, followed by addition of 2 mM CaCl<sub>2</sub> to trigger ER store refilling. Ca<sup>2+</sup> release was calculated ratiometrically between emissions of 340 and 380 nm. Cells in Ibidi chamber slides (Thistle Scientific, UK) were washed once in cold medium with 1% bovine serum albumin (BSA). Subsequently, cells were incubated at 16°C

for 1 hour with 5  $\mu\text{M}$  Fura-2, AM in complete DMEM (10% fetal calf serum,  $1 \times$  L-glutamine) with 1% BSA and 0.025% Pluronic F-127 (Sigma). The Fura-2, AM solution was then removed, and the cells were incubated in complete HBSS (supplemented with 5 mM HEPES (pH 7.2), 1 mM  $\text{MgCl}_2$  and no  $\text{CaCl}_2$ ) for 10 min to allow esterases within the cells to cleave the acetoxymethyl ester group on the probe, which would otherwise inhibit fluorescence. Cells were then washed twice with complete HBSS and imaged live using a Zeiss Axiovert 35 with an ORCA Flash 4.0 lite sCMOS camera, Cairn Optospin filter wheels, xCite 120 HXP fluorescence lamp and Metafluor software.  $\text{Ca}^{2+}$  traces and statistical analyses were then performed using GraphPad Prism 6.0. Data were analyzed using one-way ANOVA with Fischer post-hoc tests.

### **Oxidative stress assay**

Fibroblasts were plated at  $2.5 \times 10^3$  cells per well in a 96-well plate. To determine their susceptibility to oxidative stress, the cells were treated with the glutathione synthesis inhibitor L-buthionine-(*S,R*)-sulfoximine (BSO) at a concentration of 25 or 50  $\mu\text{M}$  and increasing concentrations of iron ( $\text{Fe}^{3+}$  citrate) for 48 hours to increase their oxidative burden. The cell viability was measured with Calcein-AM.

Utilizing the oxidative stress condition where unaffected control cells were least affected while the Proband 1 cells exhibited  $<10\%$  viability, the compound EPI-743 (Edison Pharmaceuticals Inc./BioElectron Technology, Mountain View, CA), which has shown efficacy in rescuing cells from individuals with primary genetic mitochondrial disease,<sup>20,21</sup> was tested between the concentrations of 1-1000 nM. The  $\text{EC}_{50}$  was calculated via and Prism (GraphPad Software, La Jolla, CA) utilizing the 4-parameter sigmoidal dose-response (variable slope) model.

### ***CCDC47* cloning and lentiviral transduction**

A *CCDC47* TrueORF Clone (RC203425, Origene Technologies, Rockville, MD) was used to amplify a *CCDC47* ORF with and without a stop codon by PCR with the Platinum *Pfx* DNA Polymerase using the following conditions for amplification: 1 cycle of 94°C for 5 minutes for template denaturation; followed by 40 cycles of 94°C for 15 seconds, 60°C for 30 seconds, and 68°C for 90 seconds; followed by a final extension at 68°C for 10 minutes. Primer sequences used for amplifying the *CCDC47* ORF are presented in Table S2.

PCR products were then cloned into the pENTR entry vector using the pENTR/D-TOPO Cloning Kit (Invitrogen/Thermo Fisher Scientific, Carlsbad, CA). Single clones were Sanger sequenced to verify the insertion and sequence integrity of the *CCDC47* ORF and a Maxiprep was performed using the Plasmid Plus Maxi Kit (Qiagen, Germantown, MD). LR recombination was performed using the Gateway LR Clonase II Enzyme Mix (Invitrogen/Thermo Fisher Scientific, Carlsbad, CA) to recombine the *CCDC47* ORF into the pLenti6.3 destination vector. Single clones were Sanger sequenced to verify the recombination and sequence integrity of the *CCDC47* ORF and a Maxiprep was performed using the Plasmid Plus Maxi Kit (Qiagen, Germantown, MD). Primer sequences used for sequencing the *CCDC47* ORF in the pENTR and pLenti6.3 vectors are presented in Table S2.

The ViraPower Lentiviral Expression System (Invitrogen/Thermo Fisher Scientific, Carlsbad, CA) was used to overexpress *CCDC47* in the patient cell line. In brief, lentivirus was generated by transfecting 293FT cells with the pLenti6.3-*CCDC47* construct and the ViraPower Packaging Mix using Lipofectamine 2000 (Invitrogen/Thermo Fisher Scientific, Carlsbad, CA). The fibroblasts from Proband 1 were transduced with the viral supernatant and stable cell lines

were selected for by the addition of 1  $\mu\text{g/ml}$  blasticidin to the complete DMEM. Overexpression of *CCDC47* mRNA and CCDC47 protein were confirmed by TaqMan gene expression assay and western blot. TaqMan gene expression assays and antibodies used for western blot are presented in Tables S1 and S3.

### **Absence of heterozygosity (AOH) analysis**

Absence of heterozygosity (AOH) was bioinformatically determined by calculating a B-allele frequency from exome data using BafCalculator (<https://github.com/BCM-Lupskilab/BafCalculator>). B-allele frequency was calculated by the ratio of variant to total reads at each base position. The Circular Binary Segmentation algorithm of the DNACopy package in R was utilized to determine genomic segments within which the DNA copy status is consistent. After subtracting 0.5 from the calculated B-allele frequency, the genomic intervals with a mean signal  $>0.45$  and have a length  $>1$  kb were predicted to be regions of AOH that potentially demonstrate identity-by-descent (IBD).<sup>22,23</sup>

## SUPPLEMENTAL REFERENCES

1. Tosato, G., and Cohen, J.I. (2007). Generation of Epstein-Barr Virus (EBV)-immortalized B cell lines. *Curr. Protoc. Immunol. Chapter 7, Unit 7.22.*
2. Sobreira, N., Schiettecatte, F., Valle, D., and Hamosh, A. (2015). GeneMatcher: A matching tool for connecting investigators with an interest in the same gene. *Hum. Mutat. 36*, 928-930.
3. Pemberton, P.J., Valkanas, E., Bone, W.P., Markello, C.J., Flynn, E.D., Links, A.E., Boerkoel, C.F., Adams, D.R., Gahl, W.A., Markello, T.C., NIH Intramural Sequencing Center, NIH Genomics Core, UDP Clinical Team. (2014). Diploid alignment of whole human genome data. In 64th Annual Meeting of the American Society of Human Genetics. (San Diego, CA).
4. McKenna, A., Hanna, M., Banks, E., Sivachenko, A., Cibulskis, K., Kernytsky, A., Garimella, K., Altshuler, D., Gabriel, S., Daly, M., et al. (2010). The Genome Analysis Toolkit: A MapReduce framework for analyzing next-generation DNA sequencing data. *Genome Res. 20*, 1297-1303.
5. DePristo, M.A., Banks, E., Poplin, R., Garimella, K.V., Maguire, J.R., Hartl, C., Philippakis, A.A., del Angel, G., Rivas, M.A., Hanna, M., et al. (2011). A framework for variation discovery and genotyping using next-generation DNA sequencing data. *Nat. Genet. 43*, 491-498.
6. Van der Auwera, G.A., Carneiro, M.O., Hartl, C., Poplin, R., Del Angel, G., Levy-Moonshine, A., Jordan, T., Shakir, K., Roazen, D., Thibault, J., et al. (2013). From FastQ data to high confidence variant calls: The Genome Analysis Toolkit best practices pipeline. *Curr. Protoc. Bioinformatics 43*, 11.10.11-33.
7. Cingolani, P., Platts, A., Wang le, L., Coon, M., Nguyen, T., Wang, L., Land, S.J., Lu, X., and Ruden, D.M. (2012). A program for annotating and predicting the effects of single nucleotide polymorphisms, SnpEff: SNPs in the genome of *Drosophila melanogaster* strain w1118; iso-2; iso-3. *Fly 6*, 80-92.
8. Richards, S., Aziz, N., Bale, S., Bick, D., Das, S., Gastier-Foster, J., Grody, W.W., Hegde, M., Lyon, E., Spector, E., et al. (2015). Standards and guidelines for the interpretation of sequence variants: A joint consensus recommendation of the American College of Medical Genetics and Genomics and the Association for Molecular Pathology. *Genet. Med. 17*, 405-424.
9. Lupski, J.R., Gonzaga-Jauregui, C., Yang, Y., Bainbridge, M.N., Jhangiani, S., Buhay, C.J., Kovar, C.L., Wang, M., Hawes, A.C., Reid, J.G., et al. (2013). Exome sequencing resolves apparent incidental findings and reveals further complexity of *SH3TC2* variant alleles causing Charcot-Marie-Tooth neuropathy. *Genome Med. 5*, 57.
10. Reid, J.G., Carroll, A., Veeraghavan, N., Dahdouli, M., Sundquist, A., English, A., Bainbridge, M., White, S., Salerno, W., Buhay, C., et al. (2014). Launching genomics into the cloud: Deployment of Mercury, a next generation sequence analysis pipeline. *BMC Bioinformatics 15*, 30.
11. Strauss, K.A., Gonzaga-Jauregui, C., Brigatti, K.W., Williams, K.B., King, A.K., Van Hout, C., Robinson, D.L., Young, M., Praveen, K., Heaps, A.D., et al. (2018). Genomic diagnostics within a medically underserved population: Efficacy and implications. *Genet. Med. 20*, 31-41.

12. Staples, J., Qiao, D., Cho, M.H., Silverman, E.K., Nickerson, D.A., and Below, J.E. (2014). PRIMUS: Rapid reconstruction of pedigrees from genome-wide estimates of identity by descent. *Am. J. Hum. Genet.* *95*, 553-564.
13. Livak, K.J., and Schmittgen, T.D. (2001). Analysis of relative gene expression data using real-time quantitative PCR and the  $2^{-\Delta\Delta CT}$  Method. *Methods* *25*, 402-408.
14. Yoshida, H., Matsui, T., Yamamoto, A., Okada, T., and Mori, K. (2001). *XBPI* mRNA is induced by ATF6 and spliced by IRE1 in response to ER stress to produce a highly active transcription factor. *Cell* *107*, 881-891.
15. van Schadewijk, A., van't Wout, E.F., Stolk, J., and Hiemstra, P.S. (2012). A quantitative method for detection of spliced X-box binding protein-1 (*XBPI*) mRNA as a measure of endoplasmic reticulum (ER) stress. *Cell Stress Chaperones* *17*, 275-279.
16. Nelson, O., Tu, H., Lei, T., Bentahir, M., de Strooper, B., and Bezprozvanny, I. (2007). Familial Alzheimer disease-linked mutations specifically disrupt  $Ca^{2+}$  leak function of presenilin 1. *J. Clin. Invest.* *117*, 1230-1239.
17. Bultynck, G., Kiviluoto, S., and Methner, A. (2014). Bax inhibitor-1 is likely a pH-sensitive calcium leak channel, not a  $H^+/Ca^{2+}$  exchanger. *Sci. Signal* *7*, pe22.
18. Yoshida, S., and Plant, S. (1992). Mechanism of release of  $Ca^{2+}$  from intracellular stores in response to ionomycin in oocytes of the frog *Xenopus laevis*. *J. Physiol.* *458*, 307-318.
19. Morgan, A.J., and Jacob, R. (1994). Ionomycin enhances  $Ca^{2+}$  influx by stimulating store-regulated cation entry and not by a direct action at the plasma membrane. *Biochem. J.* *300 (Pt 3)*, 665-672.
20. Shrader, W.D., Amagata, A., Barnes, A., Enns, G.M., Hinman, A., Jankowski, O., Kheifets, V., Komatsuzaki, R., Lee, E., Mollard, P., et al. (2011). alpha-Tocotrienol quinone modulates oxidative stress response and the biochemistry of aging. *Bioorg. Med. Chem. Lett.* *21*, 3693-3698.
21. Enns, G.M.C., B. H. (2017). Clinical trials in mitochondrial disease: An update on EPI-743 and RP103. *J. Inborn Errors Metab. Screen.* *5*, 1-7.
22. Gambin, T., Akdemir, Z.C., Yuan, B., Gu, S., Chiang, T., Carvalho, C.M.B., Shaw, C., Jhangiani, S., Boone, P.M., Eldomery, M.K., et al. (2017). Homozygous and hemizygous CNV detection from exome sequencing data in a Mendelian disease cohort. *Nucleic Acids Res.* *45*, 1633-1648.
23. Karaca, E., Posey, J.E., Coban Akdemir, Z., Pehlivan, D., Harel, T., Jhangiani, S.N., Bayram, Y., Song, X., Bahrambeigi, V., Yuregir, O.O., et al. (2018). Phenotypic expansion illuminates multilocus pathogenic variation. *Genet. Med.*  
<https://doi.org/10.1038/gim.2018.33>
